# Supplementary material for: Prevalence and Characteristics of hrHPV Infection among 414,540 Women: A Multicenter Study in Central and Eastern China
Source: PubMed Central journal article supplement — J Cancer. 2019 Apr 21;10(8):1902–8. doi: 10.7150/jca.30157 (PMC6547976; doi:10.7150/jca.30157), 2019-04-21

## Supplementary materials

**Table S1.** Information on HPV tests from 11 hospitals.

|    | <b>Hospital</b>                                                                          | <b>Location</b>    | <b>Number of tests*</b> | <b>Time span</b>        |
|----|------------------------------------------------------------------------------------------|--------------------|-------------------------|-------------------------|
| 1  | Hubei Maternal and Child Health Hospital                                                 | Wuhan, Hubei       | 9 341                   | 12/31/2013 - 03/29/2016 |
| 2  | Tongji Hospital of Tongji Medical College, Huazhong University of Science and Technology | Wuhan, Hubei       | 82 554                  | 03/11/2014 - 12/31/2016 |
| 3  | Wuhan Maternal and Child Health Hospital                                                 | Wuhan, Hubei       | 1 736                   | 09/01/2013 - 08/29/2016 |
| 4  | Huzhou Maternal and Child Care Hospital                                                  | Huzhou, Zhejiang   | 58 064                  | 01/06/2015 - 10/26/2016 |
| 5  | Ninghai Maternal and Child Health Hospital                                               | Ningbo, Zhejiang   | 41 990                  | 10/14/2012 - 12/14/2016 |
| 6  | Women's Hospital, School Of Medicine, Zhejiang University                                | Hangzhou, Zhejiang | 90 243                  | 03/18/2014 - 10/11/2016 |
| 7  | Zhuji Maternal and Child Health Hospital                                                 | Shaoxing, Zhejiang | 9 593                   | 09/16/2013 - 12/31/2016 |
| 8  | Zhuji People's Hospital                                                                  | Shaoxing, Zhejiang | 61 248                  | 07/20/2013 - 11/14/2016 |
| 9  | Zhoushan Maternity and Infant Hospital                                                   | Zhoushan, Zhejiang | 23 634                  | 01/02/2014 - 12/12/2016 |
| 10 | Jiaxing Maternity and Child Health Care Hospital                                         | Jiaxing, Zhejiang  | 69 612                  | 01/01/2014 - 10/31/2016 |
| 11 | Taizhou First People's Hospital                                                          | Taizhou, Zhejiang  | 32 019                  | 01/01/2013- 12/31/2016  |

\*Raw data which has not been processed according to selection criteria.

**Table S2.** Distribution of hrHPV single and multiple-group infection.

|       | hrHPV single-group (%) | hrHPV multiple-group (%) |
|-------|------------------------|--------------------------|
| A5/A6 | 20.8                   | 73.3                     |
| A7    | 18.4                   | 62.6                     |
| A9    | 60.8                   | 66.3                     |

The data of Jiaying Maternity and Child Health Care Hospital was excluded because the group-specific information was not available.

**Table S3.** *P* values for comparing hrHPV infection rates between age groups.

|       | ≤19 | 20-29  | 30-39  | 40-49  | ≥50    |
|-------|-----|--------|--------|--------|--------|
| ≤19   |     | <0.001 | <0.001 | <0.001 | <0.001 |
| 20-29 |     |        | 0.549  | 0.002  | <0.001 |
| 30-39 |     |        |        | 0.003  | <0.001 |
| 40-49 |     |        |        |        | <0.001 |

$P < 0.005$  was considered as statistically significant among post hoc multiple comparisons.

**Figure S1.** Age-specific infection by districts and single/multiple group in study populations. All infection rates were calculated among hrHPV positive tests.

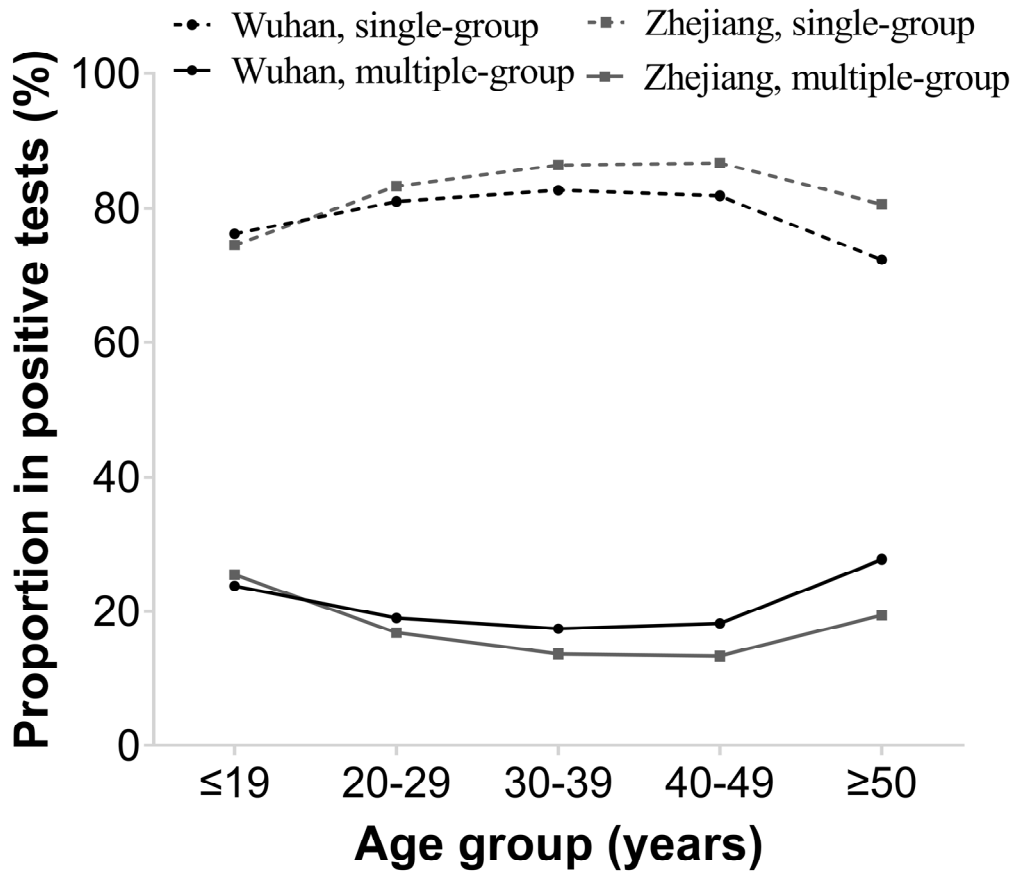

Supplement: jcav10p1902s1.pdf [file jcav10p1902s1.pdf]
